# Supplementary material
Source: PubMed Central journal article supplement (PMC2234341)
Supplement: 7601968s1.pdf [file 7601968s1.pdf]

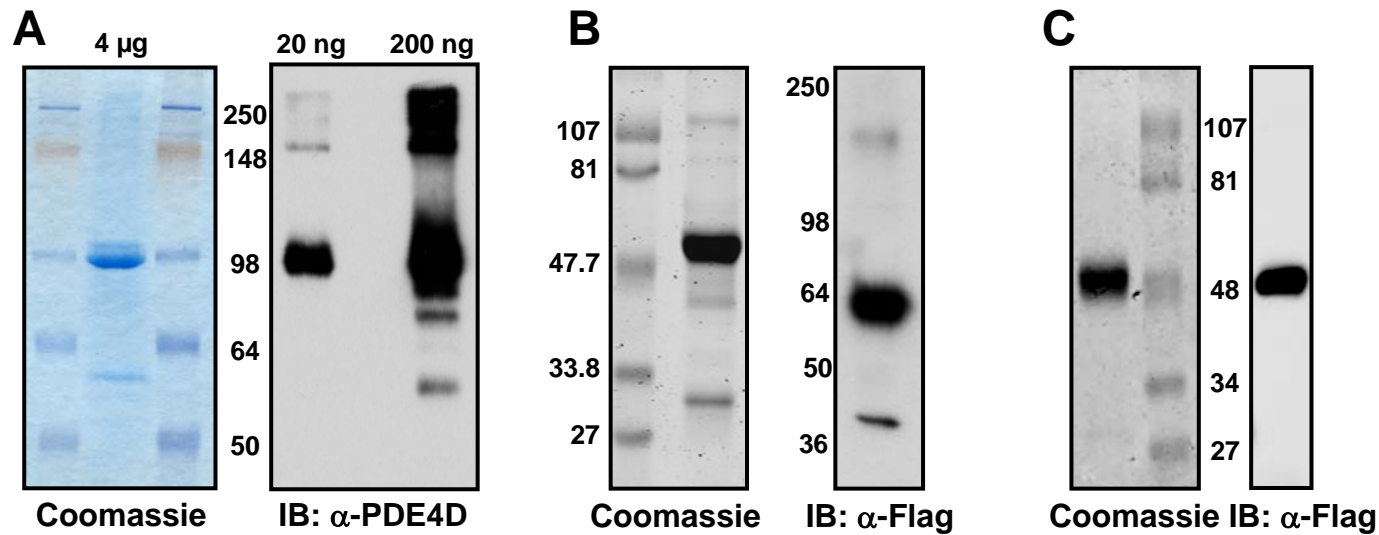

**Supplementary Figure 1** Characterization of purified PDE4D and  $\beta$ AR proteins. Recombinant PDE4D3 (**A**),  $\beta_1$ AR (**B**), and  $\beta_2$ AR (**C**) were affinity purified from Sf9 insect cells as described in Materials and Methods. They were then separated on SDS/PAGE and labeled by Coomassie staining or Western blotting using  $\alpha$ -PAN-PDE4D (Icos4D) or  $\alpha$ -Flag antibodies.  $\alpha$ -PDE4D and the  $\alpha$ -Flag antibodies that were used for Western blotting are distinct from the respective antibodies employed for affinity purification of the proteins.
