# Supplementary material
Source: PubMed Central journal article supplement (PMC2234341)
Supplement: 7601968s3.pdf [file 7601968s3.pdf]

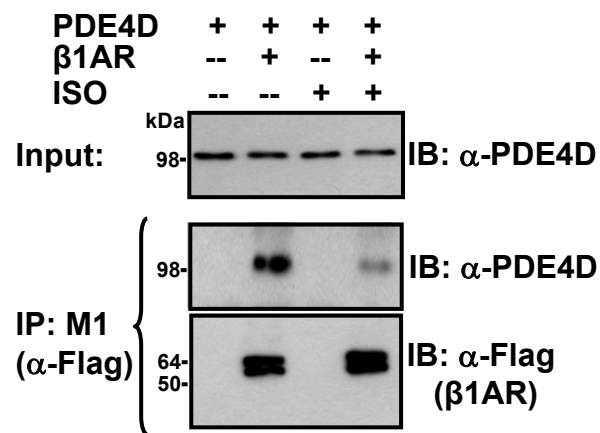

**Supplementary Figure 3**  $\beta$ -adrenergic agonists induce dissociation of  $\beta$ 1AR/PDE4D complexes in cardiac myocytes. Exogenous  $\beta$ <sub>1</sub>AR and PDE4D were co-immunoprecipitated from extracts of mouse neonatal cardiac myocytes pre-treated for 10 min with or without 10  $\mu$ M Isoproterenol (ISO). A representative experiment is reported.
