# Supplementary material
Source: PubMed Central journal article supplement (PMC2234341)
Supplement: 7601968s5.pdf [file 7601968s5.pdf]

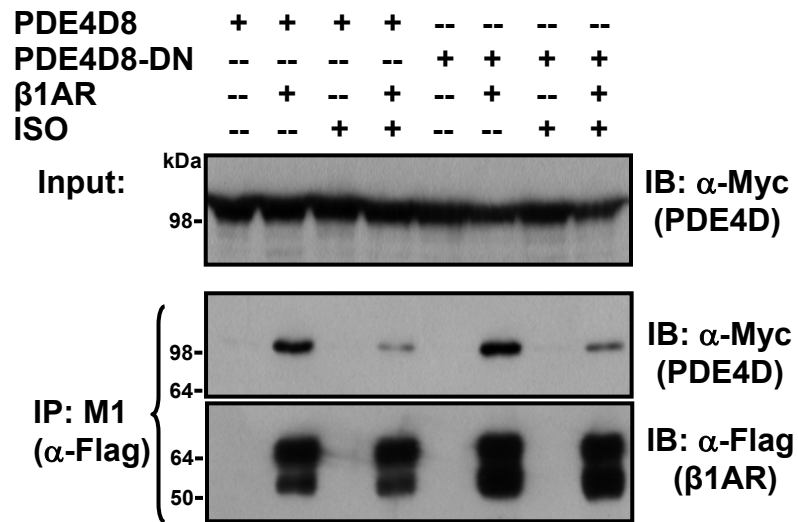

**Supplementary Figure 5** Formation and agonist-dependent dissociation of  $\beta_1$ AR/PDE4D complexes occurs whether the PDE4D is catalytically active or inactive. Exogenous  $\beta_1$ AR was co-immunoprecipitated with a catalytically active PDE4D construct (PDE4D8) or a catalytically inactive PDE4D construct (PDE4D8-DN) from extracts of Hek293 cells that had been pre-treated for 15 min with or without 10  $\mu$ M Isoproterenol (ISO). A representative experiment is reported.
